# Supplementary material for: A novel Ontology-guided Attribute Partitioning ensemble learning model for early prediction of cognitive deficits using quantitative Structural MRI in very preterm infants
Source: PubMed Central journal article supplement — Neuroimage. Author manuscript; Available in PMC 2022 Oct 15. (PMC9483989; doi:10.1016/j.neuroimage.2022.119484), 2022-07-15
Supplement: NIHMS1831724-supplement-1.pdf [file NIHMS1831724-supplement-1.pdf]

## Supplementary Materials

### A Novel Ontology-guided Attribute Partitioning Ensemble Learning for Early Prediction of Cognitive Deficit using Quantitative Structural MRI in Very Preterm Infants

Zhiyuan Li, Hailong Li, Adebayo Braimah, Jonathan R. Dillman, Nehal A. Parikh, Lili He

#### 1. Data Balancing

To handle the data imbalance issue, we applied a data synthesis approach to the training dataset after the LOOCV data split. For the CINEPS dataset, we have a smaller number of very preterm infants in the high-risk group compared to those in the low-risk group with a ratio of 1:2. With an imbalanced dataset, machine learning models are prone to become majority class classifiers, i.e., they fail to learn the concepts of the minority class. To overcome this challenge, we first generated new synthetic samples for minority class (for model training only) using the synthetic minority over-sampling (SMOTE) method [1]. Specifically, we randomly select a data point from the minority class and compute its 5 nearest neighbors' distance with multiply a random number from the unit interval (i.e.,  $(0,1)$ ) to generate the new data for the minority class. Next, we implemented the edited nearest-neighbor [2] method (ENN). We select a random data point and find the majority class of its 5 nearest neighbors and remove the data point and its 5 nearest neighbors from both minority and majority classes if the class of the selected data point is different than its 5 nearest neighbors. This process is repeated until the balance ratio of high-risk and low-risk infants in the training dataset is approximately 1:1. The method was referred to as the SMOTE-ENN method [2] with additional details illustrated in **Supplementary Table 1**.

| <b>Supplementary Table 1. SMOTE-ENN for data balancing</b>              |                                                                                                                                                                      |
|-------------------------------------------------------------------------|----------------------------------------------------------------------------------------------------------------------------------------------------------------------|
| Repeat:                                                                 |                                                                                                                                                                      |
| 1.                                                                      | Select random data from the minority class.                                                                                                                          |
| 2.                                                                      | Compute the distance between selected data and its $k$ nearest neighbors.                                                                                            |
| 3.                                                                      | Multiply a random number from the unit interval (i.e., (0, 1)) to the distance to generate the new data.                                                             |
| 4.                                                                      | Add the new data to the minority class.                                                                                                                              |
| Until the expected proportion of augmented minority class is satisfied. |                                                                                                                                                                      |
| Repeat:                                                                 |                                                                                                                                                                      |
| 1.                                                                      | Select random data and find the majority class of its $k$ nearest neighbors.                                                                                         |
| 2.                                                                      | If the class of selected data and the majority class of its $k$ nearest neighbors is different, then delete that data and its $k$ nearest neighbors from the sample. |
| Until the expected proportion of each class is satisfied.               |                                                                                                                                                                      |

## 2. Optimization of Machine Learning Models

Hyperparameters of each machine learning model in this work are summarized in **Supplementary Table 2**. All selected hyperparameters were optimized based on highest area under the receiver operator characteristic curve (AUC) using nested leave-one-out cross-validation.

**Supplementary Table 2.** Hyperparameters optimization of traditional machine learning models.

| Model                   | Hyperparameter                               | Optimization                                                                        | Selected Parameter       |
|-------------------------|----------------------------------------------|-------------------------------------------------------------------------------------|--------------------------|
| K nearest neighbor      | Number of neighbors                          | 5,10,15...,50                                                                       | 10                       |
| Logistic regression     | L2 regularization                            | 0.25,0.50,0.75,1.0                                                                  | 0.75                     |
| SVM                     | Margin penalty<br>kernel scale               | 0.25,0.50,0.75,1.0,10,15<br>$\log_{10}^{-5}, \log_{10}^{-4}, \dots, \log_{10}^{-5}$ | 0.50<br>$\log_{10}^{-2}$ |
| Decision tree           | Maximum depth                                | 2,4,6,8,10                                                                          | 6                        |
| Random Forest           | Number of decision trees<br>maximum depth    | 50,100,150,200,250<br>2,4,6,8,10                                                    | 200<br>6                 |
| Neural Network          | $L_1$ regularization<br>$L_2$ regularization | 0.1,0.3,0.5,0.7<br>0.2,0.4,0.6,0.8                                                  | 0.5<br>0.4               |
| Bagging ensemble model  | Number of base models                        | 5,10,15,20                                                                          | 10                       |
|                         | Bootstrapped sample                          | 50,100,150                                                                          | 100                      |
|                         | Maximum depth                                | 2,4,6,8                                                                             | 6                        |
|                         | $L_2$ Regularization                         | 0.001,0.01,0.1                                                                      | 0.001                    |
| Stacking ensemble model | Number of base models                        | 5,10,15,20                                                                          | 15                       |
|                         | Bootstrapped sample                          | 50,100,150                                                                          | 150                      |
|                         | Maximum depth                                | 2,4,6,8                                                                             | 4                        |
|                         | $L_2$ Regularization                         | 0.001,0.01,0.1                                                                      | 0.01                     |
| OAP-mNN                 | Number of nodes                              | 10,15,20,25,30                                                                      | 20                       |
|                         | $L_1$ regularization                         | 0.1,0.3,0.5,0.7                                                                     | 0.3                      |
|                         | $L_2$ regularization                         | 0.2,0.4,0.6,0.8                                                                     | 0.2                      |

Each step-in dot symbol in the range is assumed to be 1. Each subject in training process was normalized into a scale of [0, 1].

## 2.1 Peer Traditional Machine Learning Models

- *K-nearest neighbor*

We applied Euclidean distance as the similarity measurement between the subjects. We optimized the number of nearest neighbors through an empirical brute-force search from 5 to 50.

- *Logistic regression*

The Cross-Entropy loss with gradient descent algorithm was adopted to optimize the coefficient of logistic regression model. We also utilized  $L_2$  regularization to prevent the overfitting for the training process. The regularization parameters were optimized through an empirical brute-force search from [0.25,0.50,0.75,1].

- *Support vector machine (SVM)*

For linear SVM, we brute-force searched for hyperparameters of margin penalty with empirical values of [0.25, 0.5, 0.75, 1,10,15].

- *Decision tree*

Classification and regression trees algorithm [3] was applied to generate decision trees. We grid searched the maximum depth of the decision tree with values of [2,4,6,8,10].

- *Random forest*

We optimized the maximum depth and number of trees by grid searching the empirical values of [2,4,6,8,10] and [50,100,150,200,250].

- *Neural Network*

We designed a 5-layer neural network with an input layer, 3 hidden layers and an output layer. The number of nodes in 3 hidden layers were adopted by the empirical values of [256,128,64] [4]. The Rectified Linear Unit (ReLU) was used as activation function for each hidden layer. In output layer, the Sigmoid function was used for performing the task of binary classification. To optimize the weights of neural network, we trained neural network 1000 epochs using Adam optimization algorithm with a learning rate 0.001 on a Cross-Entropy loss with  $L_1$  and  $L_2$  regularization terms. We grid searched the  $L_1$  and  $L_2$  regularization with values of [0.1,0.3,0.5,0.7] and [0.2,0.4,0.6,0.8].

## 2.2 Peer Ensemble Learning Models

- *Majority voting ensemble model*

The majority voting [5] considers the predictions by each above described individual machine learning models as a “vote”, and the majority votes are used as the final prediction.

- *Bagging ensemble model*

Bagging trains independent base classifiers using bootstrapping on subjects and aggregates the predictions using majority voting [6]. We bootstrapped subjects with replacements to generate different subsets for training a group of parallel base XGBoost classifier [7], independently. We grid searched the number of base classifiers [5, 10, 15, 20] and number of bootstrapped subjects [50,100,150]. For the base classifier, we grid searched the maximum depth and regularization term with values of [2,4,6,8] and [0.001,0.01,0.1], respectively.

- *Stacking ensemble model*

Stacking combines the predictions of multiple base classifiers and fitting them through a meta-classifier [8]. We resampled subjects with replacements and generated subset subjects to train base XGBoost classifier. The predicted probabilities produced from base classifiers were fused by a meta neural network classifier, consisting of a feedforward fully connected hidden layer with ReLU function, and an output layer with Sigmoid function. By using a grid search method, we searched the number of base classifiers [5,10,15,20] , number of bootstrapped subjects [50,100,150 ]. For the base classifier Boost, the optimal maximum depth [2,4,6,8] and  $L_2$  regularization term [0.001,0.01,0.1] were grid searched. We train the meta neural network classifier 1000 epochs using Adam optimization with a learning rate 0.001 to optimize the model weights.

- *Attribute Bagging Ensemble Learning (AB-EL)*

The AB-EL [9] has the exact same model architecture and range values of hyperparameters as our proposed OAP-EL. We grid searched the optimal number of base classifiers and feature size (**Supplementary Table 3**).

**Supplementary Table 3.** A grid search for the optimal number of base classifiers and feature size of each base-classifier for AB-EL model. The highest AUC of 0.69 was achieved when number base-models (x-axis) and feature size of each base-model (y-axis) were 10 and 110 individually.

| AUC | 5    | 10   | 15   | 20   | 25   | 30   | 35   | 40   | 45   | 50   |
|-----|------|------|------|------|------|------|------|------|------|------|
| 50  | 0.58 | 0.62 | 0.68 | 0.64 | 0.58 | 0.63 | 0.66 | 0.65 | 0.65 | 0.64 |
| 60  | 0.63 | 0.64 | 0.58 | 0.65 | 0.63 | 0.58 | 0.64 | 0.62 | 0.66 | 0.68 |
| 70  | 0.56 | 0.58 | 0.59 | 0.64 | 0.62 | 0.66 | 0.68 | 0.65 | 0.67 | 0.63 |
| 80  | 0.62 | 0.65 | 0.66 | 0.66 | 0.65 | 0.62 | 0.58 | 0.63 | 0.61 | 0.59 |
| 90  | 0.57 | 0.62 | 0.68 | 0.58 | 0.63 | 0.57 | 0.68 | 0.67 | 0.63 | 0.68 |
| 100 | 0.59 | 0.68 | 0.62 | 0.63 | 0.57 | 0.64 | 0.66 | 0.64 | 0.62 | 0.63 |
| 110 | 0.62 | 0.69 | 0.58 | 0.61 | 0.68 | 0.66 | 0.62 | 0.67 | 0.58 | 0.60 |
| 120 | 0.59 | 0.57 | 0.66 | 0.59 | 0.62 | 0.67 | 0.58 | 0.63 | 0.54 | 0.66 |
| 130 | 0.64 | 0.63 | 0.61 | 0.65 | 0.58 | 0.62 | 0.60 | 0.62 | 0.59 | 0.56 |
| 140 | 0.58 | 0.61 | 0.64 | 0.62 | 0.65 | 0.58 | 0.59 | 0.66 | 0.66 | 0.57 |
| 150 | 0.63 | 0.58 | 0.56 | 0.62 | 0.65 | 0.65 | 0.57 | 0.60 | 0.54 | 0.60 |
| 160 | 0.58 | 0.63 | 0.59 | 0.65 | 0.65 | 0.63 | 0.65 | 0.58 | 0.56 | 0.66 |
| 170 | 0.61 | 0.57 | 0.58 | 0.63 | 0.68 | 0.58 | 0.55 | 0.59 | 0.58 | 0.62 |
| 180 | 0.60 | 0.63 | 0.62 | 0.58 | 0.66 | 0.54 | 0.57 | 0.63 | 0.60 | 0.68 |
| 190 | 0.64 | 0.62 | 0.63 | 0.54 | 0.59 | 0.60 | 0.63 | 0.60 | 0.64 | 0.65 |
| 200 | 0.59 | 0.57 | 0.60 | 0.59 | 0.60 | 0.64 | 0.61 | 0.64 | 0.62 | 0.58 |

### 2.3 OAP-enhanced Multi-Channel Neural Network (OAP-mNN)

We adopted our previous published multi-channel neural network (mNN) [10] to integrate the optimal feature sets drawn by our proposed ontology-guided attribute partitioning (OAP) method. We used 6 parallel channels based on the determined optimal number of feature clusters ( $k = 6$ ). Each input layer connects a fully connected layer and concatenate all nodes into one signal channel to extract high-level features and connect to another fully connected layer. We grid searched number of nodes with values of [10,15,20,25,30]. The ReLU was applied as the activation function for each hidden layer, and the Sigmoid function was used for output layer. We trained OAP-mNN 1000 epochs using Adam optimization with a learning rate 0.001 on a Cross-Entropy loss with  $L_1$  and  $L_2$  regularization. The  $L_1$  and  $L_2$  terms with values of [0.1,0.3,0.5,0.7] and [0.2,0.4,0.6,0.8] were optimized using a grid search.

### 3. Silhouette Score Calculation

Let  $f(x)$  be the mean intra-cluster distance between the selected sample  $x$  and other samples in the same cluster. And  $g(x)$  be the mean nearest-cluster distance between the selected sample  $x$  and other samples in the nearest cluster.

The Silhouette score  $S$  is defined as follows:

$$S = \frac{f(x) - g(x)}{\max(f(x), g(x))} \in [-1,1]$$

A higher score of  $S$  indicates the better clustering performance. A negative score of  $S$  indicates that the samples might be assigned into a wrong cluster.

#### 4. Analysis of OAP-derived Feature Clusters

Here, we display a pie chart showing the percentage of ROIs involved per feature cluster. As showed in **Supplemental Figure 1**, the largest feature cluster is Cluster 1, which involved 86.2% of ROIs.

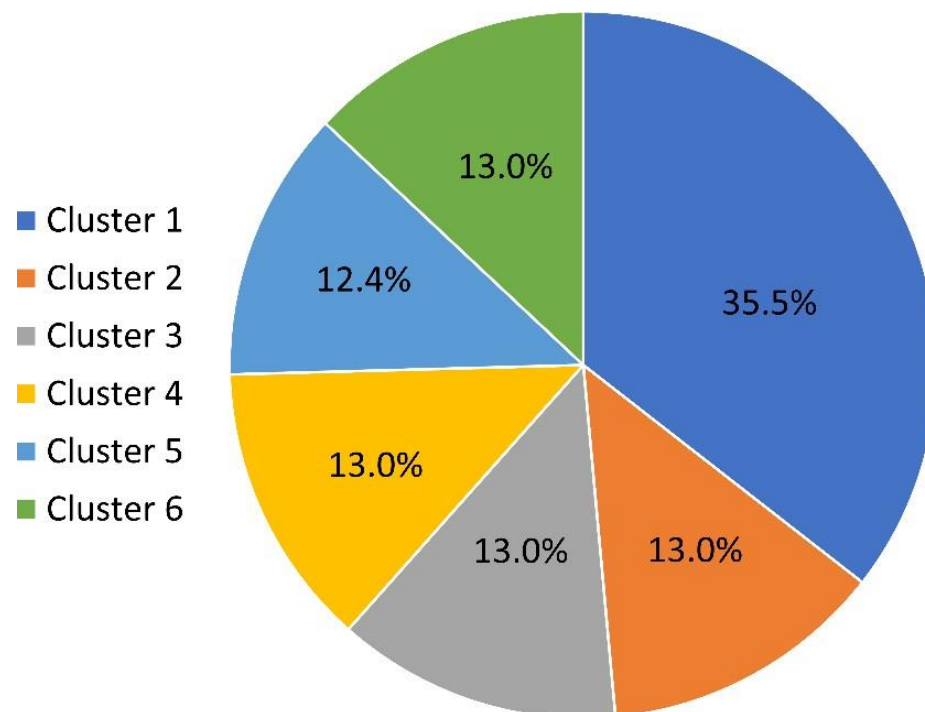

**Supplemental Figure 1.** Pie chart showing the percentage of features within each cluster, and the percentage of brain regions of interest (ROIs) involved within individual feature clusters ( $k=6$ ).

## 5. Feature Lists:

(510 total)

volume  
volume - CSF  
volume - Cortical gray matter  
volume - White matter  
volume - Background  
volume - Ventricles  
volume - Cerebellum  
volume - Deep Gray Matter  
volume - Brainstem  
volume - Hippocampi and Amygdala  
rel-volume - CSF  
rel-volume - Cortical gray matter  
rel-volume - White matter  
  
rel-volume - Background  
  
rel-volume - Ventricles  
  
rel-volume - Cerebellum  
  
rel-volume - Deep Gray Matter  
  
rel-volume - Brainstem  
  
rel-volume - Hippocampi and Amygdala  
  
volume - Hippocampus left  
  
volume - Hippocampus right  
  
volume - Amygdala left  
  
volume - Amygdala right  
volume - Anterior temporal lobe medial part left GM  
volume - Anterior temporal lobe medial part right GM  
volume - Anterior temporal lobe lateral part left GM  
volume - Anterior temporal lobe lateral part right GM  
volume - Gyri parahippocampalis et ambiens anterior part left GM  
volume - Gyri parahippocampalis et ambiens anterior part right GM  
volume - Superior temporal gyrus middle part left GM  
volume - Superior temporal gyrus middle part

(338 total)

rel-volume - CSF  
rel-volume - Cortical gray matter  
rel-volume - White matter  
rel-volume - Background  
rel-volume - Ventricles  
rel-volume - Cerebellum  
rel-volume - Deep Gray Matter  
rel-volume - Brainstem  
rel-volume - Hippocampi and Amygdala  
rel-volume - Hippocampus left  
rel-volume - Hippocampus right  
rel-volume - Amygdala left  
rel-volume - Amygdala right  
rel-volume - Anterior temporal lobe medial part left GM  
rel-volume - Anterior temporal lobe medial part right GM  
rel-volume - Anterior temporal lobe lateral part left GM  
rel-volume - Anterior temporal lobe lateral part right GM  
rel-volume - Gyri parahippocampalis et ambiens anterior part left GM  
rel-volume - Gyri parahippocampalis et ambiens anterior part right GM  
rel-volume - Superior temporal gyrus middle part left GM  
rel-volume - Superior temporal gyrus middle part right GM  
rel-volume - Medial and inferior temporal gyri anterior part left GM  
rel-volume - Medial and inferior temporal gyri anterior part right GM  
rel-volume - Lateral occipitotemporal gyrus gyrus fusiformis anterior part left GM  
rel-volume - Lateral occipitotemporal gyrus gyrus fusiformis anterior part right GM  
  
rel-volume - Cerebellum left  
  
rel-volume - Cerebellum right  
  
rel-volume - Brainstem spans the midline  
  
rel-volume - Insula right GM  
  
rel-volume - Insula left GM  
rel-volume - Occipital lobe right GM

right GM  
 volume - Medial and inferior temporal gyri anterior part left GM  
 volume - Medial and inferior temporal gyri anterior part right GM  
 volume - Lateral occipitotemporal gyrus gyrus fusiformis anterior part left GM  
 volume - Lateral occipitotemporal gyrus gyrus fusiformis anterior part right GM  
  
 volume - Cerebellum left  
  
 volume - Cerebellum right  
  
 volume - Brainstem spans the midline  
  
 volume - Insula right GM  
  
 volume - Insula left GM  
  
 volume - Occipital lobe right GM  
 volume - Occipital lobe left GM  
 volume - Gyri parahippocampalis et ambiens posterior part right GM  
 volume - Gyri parahippocampalis et ambiens posterior part left GM  
 volume - Lateral occipitotemporal gyrus gyrus fusiformis posterior part right GM  
 volume - Lateral occipitotemporal gyrus gyrus fusiformis posterior part left GM  
 volume - Medial and inferior temporal gyri posterior part right GM  
 volume - Medial and inferior temporal gyri posterior part left GM  
 volume - Superior temporal gyrus posterior part right GM  
 volume - Superior temporal gyrus posterior part left GM  
  
 volume - Cingulate gyrus anterior part right GM  
  
 volume - Cingulate gyrus anterior part left GM  
 volume - Cingulate gyrus posterior part right GM  
 volume - Cingulate gyrus posterior part left GM  
 volume - Frontal lobe right GM  
 volume - Frontal lobe left GM  
 volume - Parietal lobe right GM  
 volume - Parietal lobe left GM  
 volume - Caudate nucleus right  
  
 volume - Caudate nucleus left

rel-volume - Occipital lobe left GM  
 rel-volume - Gyri parahippocampalis et ambiens posterior part right GM  
 rel-volume - Gyri parahippocampalis et ambiens posterior part left GM  
 rel-volume - Lateral occipitotemporal gyrus gyrus fusiformis posterior part right GM  
 rel-volume - Lateral occipitotemporal gyrus gyrus fusiformis posterior part left GM  
 rel-volume - Medial and inferior temporal gyri posterior part right GM  
 rel-volume - Medial and inferior temporal gyri posterior part left GM  
 rel-volume - Superior temporal gyrus posterior part right GM  
 rel-volume - Superior temporal gyrus posterior part left GM  
 rel-volume - Cingulate gyrus anterior part right GM  
 rel-volume - Cingulate gyrus anterior part left GM  
 rel-volume - Cingulate gyrus posterior part right GM  
 rel-volume - Cingulate gyrus posterior part left GM  
  
 rel-volume - Frontal lobe right GM  
  
 rel-volume - Frontal lobe left GM  
  
 rel-volume - Parietal lobe right GM  
  
 rel-volume - Parietal lobe left GM  
  
 rel-volume - Caudate nucleus right  
  
 rel-volume - Caudate nucleus left  
 rel-volume - Thalamus right high intensity part in T2  
 rel-volume - Thalamus left high intensity part in T2  
 rel-volume - Subthalamic nucleus right  
 rel-volume - Subthalamic nucleus left  
 rel-volume - Lentiform Nucleus right  
 rel-volume - Lentiform Nucleus left  
 rel-volume - Corpus Callosum  
 rel-volume - Lateral Ventricle left  
 rel-volume - Lateral Ventricle right  
 rel-volume - Anterior temporal lobe medial part left WM



|                                                                                 |                                                                                      |
|---------------------------------------------------------------------------------|--------------------------------------------------------------------------------------|
| volume - Thalamus right high intensity part in T2                               | rel-volume - Anterior temporal lobe medial part right WM                             |
| volume - Thalamus left high intensity part in T2                                | rel-volume - Anterior temporal lobe lateral part left WM                             |
| volume - Subthalamic nucleus right                                              | rel-volume - Anterior temporal lobe lateral part right WM                            |
| volume - Subthalamic nucleus left                                               | rel-volume - Gyri parahippocampalis et ambiens anterior part left WM                 |
| volume - Lentiform Nucleus right                                                | rel-volume - Gyri parahippocampalis et ambiens anterior part right WM                |
| volume - Lentiform Nucleus left                                                 | rel-volume - Superior temporal gyrus middle part left WM                             |
| volume - Corpus Callosum                                                        | rel-volume - Superior temporal gyrus middle part right WM                            |
| volume - Lateral Ventricle left                                                 | rel-volume - Medial and inferior temporal gyri anterior part left WM                 |
| volume - Lateral Ventricle right                                                | rel-volume - Medial and inferior temporal gyri anterior part right WM                |
| volume - Anterior temporal lobe medial part left WM                             | rel-volume - Lateral occipitotemporal gyrus gyrus fusiformis anterior part left WM   |
| volume - Anterior temporal lobe medial part right WM                            | rel-volume - Lateral occipitotemporal gyrus gyrus fusiformis anterior part right WM  |
| volume - Anterior temporal lobe lateral part left WM                            | rel-volume - Insula right WM                                                         |
| volume - Anterior temporal lobe lateral part right WM                           | rel-volume - Insula left WM                                                          |
| volume - Gyri parahippocampalis et ambiens anterior part left WM                | rel-volume - Occipital lobe right WM                                                 |
| volume - Gyri parahippocampalis et ambiens anterior part right WM               | rel-volume - Occipital lobe left WM                                                  |
| volume - Superior temporal gyrus middle part left WM                            | rel-volume - Gyri parahippocampalis et ambiens posterior part right WM               |
| volume - Superior temporal gyrus middle part right WM                           | rel-volume - Gyri parahippocampalis et ambiens posterior part left WM                |
| volume - Medial and inferior temporal gyri anterior part left WM                | rel-volume - Lateral occipitotemporal gyrus gyrus fusiformis posterior part right WM |
| volume - Medial and inferior temporal gyri anterior part right WM               | rel-volume - Lateral occipitotemporal gyrus gyrus fusiformis posterior part left WM  |
| volume - Lateral occipitotemporal gyrus gyrus fusiformis anterior part left WM  | rel-volume - Medial and inferior temporal gyri posterior part right WM               |
| volume - Lateral occipitotemporal gyrus gyrus fusiformis anterior part right WM | rel-volume - Medial and inferior temporal gyri posterior part left WM                |
| volume - Insula right WM                                                        | rel-volume - Superior temporal gyrus posterior part right WM                         |
| volume - Insula left WM                                                         | rel-volume - Superior temporal gyrus posterior part left WM                          |
| volume - Occipital lobe right WM                                                | rel-volume - Cingulate gyrus anterior part right WM                                  |
| volume - Occipital lobe left WM                                                 | rel-volume - Cingulate gyrus anterior part left WM                                   |
| volume - Gyri parahippocampalis et ambiens posterior part right WM              | rel-volume - Cingulate gyrus posterior part right WM                                 |

|                                                                                  |                                                                                       |
|----------------------------------------------------------------------------------|---------------------------------------------------------------------------------------|
| volume - Gyri parahippocampalis et ambiens posterior part left WM                | rel-volume - Cingulate gyrus posterior part left WM                                   |
| volume - Lateral occipitotemporal gyrus gyrus fusiformis posterior part right WM | rel-volume - Frontal lobe right WM                                                    |
| volume - Lateral occipitotemporal gyrus gyrus fusiformis posterior part left WM  | rel-volume - Frontal lobe left WM                                                     |
| volume - Medial and inferior temporal gyri posterior part right WM               | rel-volume - Parietal lobe right WM                                                   |
| volume - Medial and inferior temporal gyri posterior part left WM                | rel-volume - Parietal lobe left WM                                                    |
| volume - Superior temporal gyrus posterior part right WM                         | rel-volume - CSF.1                                                                    |
| volume - Superior temporal gyrus posterior part left WM                          | rel-volume - Extra-cranial background                                                 |
| volume - Cingulate gyrus anterior part right WM                                  | rel-volume - Intra-cranial background                                                 |
| volume - Cingulate gyrus anterior part left WM                                   | rel-volume - Thalamus right low intensity part in T2                                  |
| volume - Cingulate gyrus posterior part right WM                                 | rel-volume - Thalamus left low intensity part in T2                                   |
| volume - Cingulate gyrus posterior part left WM                                  | rel-volume - Temporal lobe left GM (merged region)                                    |
| volume - Frontal lobe right WM                                                   | rel-volume - Temporal lobe right GM (merged region)                                   |
| volume - Frontal lobe left WM                                                    | rel-volume - Temporal lobe left WM (merged region)                                    |
| volume - Parietal lobe right WM                                                  | rel-volume - Temporal lobe right WM (merged region)                                   |
| volume - Parietal lobe left WM                                                   | rel-volume - Superior temporal gyrus left GM (merged region)                          |
| volume - CSF.1                                                                   | rel-volume - Superior temporal gyrus right GM (merged region)                         |
| volume - Extra-cranial background                                                | rel-volume - Superior temporal gyrus left WM (merged region)                          |
| volume - Intra-cranial background                                                | rel-volume - Superior temporal gyrus right WM (merged region)                         |
| volume - Thalamus right low intensity part in T2                                 | rel-volume - Medial and inferior temporal gyri left GM (merged region)                |
| volume - Thalamus left low intensity part in T2                                  | rel-volume - Medial and inferior temporal gyri right GM (merged region)               |
| volume - Temporal lobe left GM (merged region)                                   | rel-volume - Medial and inferior temporal gyri left WM (merged region)                |
| volume - Temporal lobe right GM (merged region)                                  | rel-volume - Medial and inferior temporal gyri right WM (merged region)               |
| volume - Temporal lobe left WM (merged region)                                   | rel-volume - Lateral occipitotemporal gyrus gyrus fusiformis left GM (merged region)  |
| volume - Temporal lobe right WM (merged region)                                  | rel-volume - Lateral occipitotemporal gyrus gyrus fusiformis right GM (merged region) |
| volume - Superior temporal gyrus left GM (merged region)                         | rel-volume - Lateral occipitotemporal gyrus gyrus fusiformis left WM (merged region)  |
| volume - Superior temporal gyrus right GM (merged region)                        | rel-volume - Lateral occipitotemporal gyrus gyrus fusiformis right WM (merged region) |
| volume - Superior temporal gyrus left WM                                         | rel-volume - Cingulate gyrus left GM (merged                                          |

|                                                                                   |                                                                                  |
|-----------------------------------------------------------------------------------|----------------------------------------------------------------------------------|
| (merged region)                                                                   | region)                                                                          |
| volume - Superior temporal gyrus right WM (merged region)                         | rel-volume - Cingulate gyrus right GM (merged region)                            |
| volume - Medial and inferior temporal gyri left GM (merged region)                | rel-volume - Cingulate gyrus left WM (merged region)                             |
| volume - Medial and inferior temporal gyri right GM (merged region)               | rel-volume - Cingulate gyrus right WM (merged region)                            |
| volume - Medial and inferior temporal gyri left WM (merged region)                | rel-volume - Gyri parahippocampalis et ambiens left GM (merged region)           |
| volume - Medial and inferior temporal gyri right WM (merged region)               | rel-volume - Gyri parahippocampalis et ambiens right GM (merged region)          |
| volume - Lateral occipitotemporal gyrus gyrus fusiformis left GM (merged region)  | rel-volume - Gyri parahippocampalis et ambiens left WM (merged region)           |
| volume - Lateral occipitotemporal gyrus gyrus fusiformis right GM (merged region) | rel-volume - Gyri parahippocampalis et ambiens right WM (merged region)          |
| volume - Lateral occipitotemporal gyrus gyrus fusiformis left WM (merged region)  | thickness - Anterior temporal lobe medial part left                              |
| volume - Lateral occipitotemporal gyrus gyrus fusiformis right WM (merged region) | thickness - Anterior temporal lobe medial part right                             |
|                                                                                   | thickness - Anterior temporal lobe lateral part left                             |
| volume - Cingulate gyrus left GM (merged region)                                  | thickness - Anterior temporal lobe lateral part right                            |
| volume - Cingulate gyrus right GM (merged region)                                 | thickness - Gyri parahippocampalis et ambiens anterior part left                 |
| volume - Cingulate gyrus left WM (merged region)                                  | thickness - Gyri parahippocampalis et ambiens anterior part right                |
| volume - Cingulate gyrus right WM (merged region)                                 | thickness - Superior temporal gyrus middle part left                             |
| volume - Gyri parahippocampalis et ambiens left GM (merged region)                | thickness - Superior temporal gyrus middle part right                            |
| volume - Gyri parahippocampalis et ambiens right GM (merged region)               | thickness - Medial and inferior temporal gyri anterior part left                 |
| volume - Gyri parahippocampalis et ambiens left WM (merged region)                | thickness - Medial and inferior temporal gyri anterior part right                |
| volume - Gyri parahippocampalis et ambiens right WM (merged region)               | thickness - Lateral occipitotemporal gyrus gyrus fusiformis anterior part left   |
|                                                                                   | thickness - Lateral occipitotemporal gyrus gyrus fusiformis anterior part right  |
| rel-volume - Hippocampus left                                                     | thickness - Insula right                                                         |
|                                                                                   | thickness - Insula left                                                          |
| rel-volume - Hippocampus right                                                    |                                                                                  |
| rel-volume - Amygdala left                                                        | thickness - Occipital lobe right                                                 |
| rel-volume - Amygdala right                                                       |                                                                                  |
| rel-volume - Anterior temporal lobe medial part left GM                           | thickness - Occipital lobe left                                                  |
| rel-volume - Anterior temporal lobe medial part right GM                          | thickness - Gyri parahippocampalis et ambiens posterior part right               |
| rel-volume - Anterior temporal lobe lateral part left GM                          | thickness - Gyri parahippocampalis et ambiens posterior part left                |
| rel-volume - Anterior temporal lobe lateral part right GM                         | thickness - Lateral occipitotemporal gyrus gyrus fusiformis posterior part right |
| rel-volume - Gyri parahippocampalis et ambiens anterior part left GM              | thickness - Lateral occipitotemporal gyrus gyrus                                 |
| rel-volume - Gyri parahippocampalis et ambiens                                    |                                                                                  |

|                                                                                      |                                                                                   |
|--------------------------------------------------------------------------------------|-----------------------------------------------------------------------------------|
| anterior part right GM                                                               | fusiformis posterior part left                                                    |
| rel-volume - Superior temporal gyrus middle part left GM                             | thickness - Medial and inferior temporal gyri posterior part right                |
| rel-volume - Superior temporal gyrus middle part right GM                            | thickness - Medial and inferior temporal gyri posterior part left                 |
| rel-volume - Medial and inferior temporal gyri anterior part left GM                 | thickness - Superior temporal gyrus posterior part right                          |
| rel-volume - Medial and inferior temporal gyri anterior part right GM                | thickness - Superior temporal gyrus posterior part left                           |
| rel-volume - Lateral occipitotemporal gyrus gyrus fusiformis anterior part left GM   | thickness - Cingulate gyrus anterior part right                                   |
| rel-volume - Lateral occipitotemporal gyrus gyrus fusiformis anterior part right GM  | thickness - Cingulate gyrus anterior part left                                    |
| rel-volume - Cerebellum left                                                         | thickness - Cingulate gyrus posterior part right                                  |
| rel-volume - Cerebellum right                                                        | thickness - Cingulate gyrus posterior part left                                   |
| rel-volume - Brainstem spans the midline                                             | thickness - Frontal lobe right                                                    |
| rel-volume - Insula right GM                                                         | thickness - Frontal lobe left                                                     |
| rel-volume - Insula left GM                                                          | thickness - Parietal lobe right                                                   |
| rel-volume - Occipital lobe right GM                                                 | thickness - Parietal lobe left                                                    |
| rel-volume - Occipital lobe left GM                                                  | thickness - Temporal lobe left (merged region)                                    |
| rel-volume - Gyri parahippocampalis et ambiens posterior part right GM               | thickness - Temporal lobe right (merged region)                                   |
| rel-volume - Gyri parahippocampalis et ambiens posterior part left GM                | thickness - Superior temporal gyrus left (merged region)                          |
| rel-volume - Lateral occipitotemporal gyrus gyrus fusiformis posterior part right GM | thickness - Superior temporal gyrus right (merged region)                         |
| rel-volume - Lateral occipitotemporal gyrus gyrus fusiformis posterior part left GM  | thickness - Medial and inferior temporal gyri left (merged region)                |
| rel-volume - Medial and inferior temporal gyri posterior part right GM               | thickness - Medial and inferior temporal gyri right (merged region)               |
| rel-volume - Medial and inferior temporal gyri posterior part left GM                | thickness - Lateral occipitotemporal gyrus gyrus fusiformis left (merged region)  |
| rel-volume - Superior temporal gyrus posterior part right GM                         | thickness - Lateral occipitotemporal gyrus gyrus fusiformis right (merged region) |
| rel-volume - Superior temporal gyrus posterior part left GM                          | thickness - Cingulate gyrus left (merged region)                                  |
| rel-volume - Cingulate gyrus anterior part right GM                                  | thickness - Cingulate gyrus right (merged region)                                 |
| rel-volume - Cingulate gyrus anterior part left GM                                   | thickness - Gyri parahippocampalis et ambiens left (merged region)                |
| rel-volume - Cingulate gyrus posterior part right GM                                 | thickness - Gyri parahippocampalis et ambiens right (merged region)               |
| rel-volume - Cingulate gyrus posterior part left GM                                  |                                                                                   |
| rel-volume - Frontal lobe right GM                                                   | sulc - Anterior temporal lobe medial part left                                    |
| rel-volume - Frontal lobe left GM                                                    | sulc - Anterior temporal lobe medial part right                                   |
| rel-volume - Parietal lobe right GM                                                  | sulc - Anterior temporal lobe lateral part left                                   |
|                                                                                      | sulc - Anterior temporal lobe lateral part right                                  |
| rel-volume - Parietal lobe left GM                                                   | sulc - Gyri parahippocampalis et ambiens anterior part left                       |
|                                                                                      | sulc - Gyri parahippocampalis et ambiens anterior part right                      |
| rel-volume - Caudate nucleus right                                                   |                                                                                   |

rel-volume - Caudate nucleus left

rel-volume - Thalamus right high intensity part in T2

rel-volume - Thalamus left high intensity part in T2

rel-volume - Subthalamic nucleus right

rel-volume - Subthalamic nucleus left

rel-volume - Lentiform Nucleus right

rel-volume - Lentiform Nucleus left

rel-volume - Corpus Callosum

rel-volume - Lateral Ventricle left

rel-volume - Lateral Ventricle right

rel-volume - Anterior temporal lobe medial part left WM

rel-volume - Anterior temporal lobe medial part right WM

rel-volume - Anterior temporal lobe lateral part left WM

rel-volume - Anterior temporal lobe lateral part right WM

rel-volume - Gyri parahippocampalis et ambiens anterior part left WM

rel-volume - Gyri parahippocampalis et ambiens anterior part right WM

rel-volume - Superior temporal gyrus middle part left WM

rel-volume - Superior temporal gyrus middle part right WM

rel-volume - Medial and inferior temporal gyri anterior part left WM

rel-volume - Medial and inferior temporal gyri anterior part right WM

rel-volume - Lateral occipitotemporal gyrus gyrus fusiformis anterior part left WM

rel-volume - Lateral occipitotemporal gyrus gyrus fusiformis anterior part right WM

rel-volume - Insula right WM

rel-volume - Insula left WM

rel-volume - Occipital lobe right WM

rel-volume - Occipital lobe left WM

rel-volume - Gyri parahippocampalis et ambiens posterior part right WM

rel-volume - Gyri parahippocampalis et ambiens posterior part left WM

rel-volume - Lateral occipitotemporal gyrus gyrus fusiformis posterior part right WM

rel-volume - Lateral occipitotemporal gyrus gyrus fusiformis posterior part left WM

sulc - Superior temporal gyrus middle part left

sulc - Superior temporal gyrus middle part right

sulc - Medial and inferior temporal gyri anterior part left

sulc - Medial and inferior temporal gyri anterior part right

sulc - Lateral occipitotemporal gyrus gyrus fusiformis anterior part left

sulc - Lateral occipitotemporal gyrus gyrus fusiformis anterior part right

sulc - Insula right

sulc - Insula left

sulc - Occipital lobe right

sulc - Occipital lobe left

sulc - Gyri parahippocampalis et ambiens posterior part right

sulc - Gyri parahippocampalis et ambiens posterior part left

sulc - Lateral occipitotemporal gyrus gyrus fusiformis posterior part right

sulc - Lateral occipitotemporal gyrus gyrus fusiformis posterior part left

sulc - Medial and inferior temporal gyri posterior part right

sulc - Medial and inferior temporal gyri posterior part left

sulc - Superior temporal gyrus posterior part right

sulc - Superior temporal gyrus posterior part left

sulc - Cingulate gyrus anterior part right

sulc - Cingulate gyrus anterior part left

sulc - Cingulate gyrus posterior part right

sulc - Cingulate gyrus posterior part left

sulc - Frontal lobe right

sulc - Frontal lobe left

sulc - Parietal lobe right

sulc - Parietal lobe left

sulc - Temporal lobe left (merged region)

sulc - Temporal lobe right (merged region)

sulc - Superior temporal gyrus left (merged region)

sulc - Superior temporal gyrus right (merged region)

|                                                                        |                                                                                 |
|------------------------------------------------------------------------|---------------------------------------------------------------------------------|
| rel-volume - Medial and inferior temporal gyri posterior part right WM | sulc - Medial and inferior temporal gyri left (merged region)                   |
| rel-volume - Medial and inferior temporal gyri posterior part left WM  | sulc - Medial and inferior temporal gyri right (merged region)                  |
| rel-volume - Superior temporal gyrus posterior part right WM           | sulc - Lateral occipitotemporal gyrus gyrus fusiformis left (merged region)     |
| rel-volume - Superior temporal gyrus posterior part left WM            | sulc - Lateral occipitotemporal gyrus gyrus fusiformis right (merged region)    |
| rel-volume - Cingulate gyrus anterior part right WM                    | sulc - Cingulate gyrus left (merged region)                                     |
| rel-volume - Cingulate gyrus anterior part left WM                     | sulc - Cingulate gyrus right (merged region)                                    |
| rel-volume - Cingulate gyrus posterior part right WM                   | sulc - Gyri parahippocampalis et ambiens left (merged region)                   |
| rel-volume - Cingulate gyrus posterior part left WM                    | sulc - Gyri parahippocampalis et ambiens right (merged region)                  |
| rel-volume - Frontal lobe right WM                                     | curvature - Anterior temporal lobe medial part left                             |
| rel-volume - Frontal lobe left WM                                      | curvature - Anterior temporal lobe medial part right                            |
| rel-volume - Parietal lobe right WM                                    | curvature - Anterior temporal lobe lateral part left                            |
| rel-volume - Parietal lobe left WM                                     | curvature - Anterior temporal lobe lateral part right                           |
| rel-volume - CSF.1                                                     | curvature - Gyri parahippocampalis et ambiens anterior part left                |
| rel-volume - Extra-cranial background                                  | curvature - Gyri parahippocampalis et ambiens anterior part right               |
| rel-volume - Intra-cranial background                                  | curvature - Superior temporal gyrus middle part left                            |
| rel-volume - Thalamus right low intensity part in T2                   | curvature - Superior temporal gyrus middle part right                           |
| rel-volume - Thalamus left low intensity part in T2                    | curvature - Medial and inferior temporal gyri anterior part left                |
| rel-volume - Temporal lobe left GM (merged region)                     | curvature - Medial and inferior temporal gyri anterior part right               |
| rel-volume - Temporal lobe right GM (merged region)                    | curvature - Lateral occipitotemporal gyrus gyrus fusiformis anterior part left  |
| rel-volume - Temporal lobe left WM (merged region)                     | curvature - Lateral occipitotemporal gyrus gyrus fusiformis anterior part right |
| rel-volume - Temporal lobe right WM (merged region)                    | curvature - Insula right                                                        |
| rel-volume - Superior temporal gyrus left GM (merged region)           | curvature - Insula left                                                         |
| rel-volume - Superior temporal gyrus right GM (merged region)          | curvature - Occipital lobe right                                                |
| rel-volume - Superior temporal gyrus left WM (merged region)           | curvature - Occipital lobe left                                                 |
| rel-volume - Superior temporal gyrus right WM (merged region)          | curvature - Gyri parahippocampalis et ambiens posterior part right              |
| rel-volume - Medial and inferior temporal gyri left GM (merged region) | curvature - Gyri parahippocampalis et ambiens posterior part left               |

|                                                                                       |                                                                                   |
|---------------------------------------------------------------------------------------|-----------------------------------------------------------------------------------|
| rel-volume - Medial and inferior temporal gyri right GM (merged region)               | curvature - Lateral occipitotemporal gyrus gyrus fusiformis posterior part right  |
| rel-volume - Medial and inferior temporal gyri left WM (merged region)                | curvature - Lateral occipitotemporal gyrus gyrus fusiformis posterior part left   |
| rel-volume - Medial and inferior temporal gyri right WM (merged region)               | curvature - Medial and inferior temporal gyri posterior part right                |
| rel-volume - Lateral occipitotemporal gyrus gyrus fusiformis left GM (merged region)  | curvature - Medial and inferior temporal gyri posterior part left                 |
| rel-volume - Lateral occipitotemporal gyrus gyrus fusiformis right GM (merged region) | curvature - Superior temporal gyrus posterior part right                          |
| rel-volume - Lateral occipitotemporal gyrus gyrus fusiformis left WM (merged region)  | curvature - Superior temporal gyrus posterior part left                           |
| rel-volume - Lateral occipitotemporal gyrus gyrus fusiformis right WM (merged region) | curvature - Cingulate gyrus anterior part right                                   |
| rel-volume - Cingulate gyrus left GM (merged region)                                  | curvature - Cingulate gyrus anterior part left                                    |
| rel-volume - Cingulate gyrus right GM (merged region)                                 | curvature - Cingulate gyrus posterior part right                                  |
| rel-volume - Cingulate gyrus left WM (merged region)                                  | curvature - Cingulate gyrus posterior part left                                   |
| rel-volume - Cingulate gyrus right WM (merged region)                                 | curvature - Frontal lobe right                                                    |
| rel-volume - Gyri parahippocampalis et ambiens left GM (merged region)                | curvature - Frontal lobe left                                                     |
| rel-volume - Gyri parahippocampalis et ambiens right GM (merged region)               | curvature - Parietal lobe right                                                   |
| rel-volume - Gyri parahippocampalis et ambiens left WM (merged region)                | curvature - Parietal lobe left                                                    |
| rel-volume - Gyri parahippocampalis et ambiens right WM (merged region)               | curvature - Temporal lobe left (merged region)                                    |
| thickness                                                                             | curvature - Temporal lobe right (merged region)                                   |
| thickness - Anterior temporal lobe medial part left                                   | curvature - Superior temporal gyrus left (merged region)                          |
| thickness - Anterior temporal lobe medial part right                                  | curvature - Superior temporal gyrus right (merged region)                         |
| thickness - Anterior temporal lobe lateral part left                                  | curvature - Medial and inferior temporal gyri left (merged region)                |
| thickness - Anterior temporal lobe lateral part right                                 | curvature - Medial and inferior temporal gyri right (merged region)               |
| thickness - Gyri parahippocampalis et ambiens anterior part left                      | curvature - Lateral occipitotemporal gyrus gyrus fusiformis left (merged region)  |
| thickness - Gyri parahippocampalis et ambiens anterior part right                     | curvature - Lateral occipitotemporal gyrus gyrus fusiformis right (merged region) |
| thickness - Superior temporal gyrus middle part left                                  | curvature - Cingulate gyrus left (merged region)                                  |
| thickness - Superior temporal gyrus middle part right                                 | curvature - Cingulate gyrus right (merged region)                                 |
| thickness - Medial and inferior temporal gyri anterior part left                      | curvature - Gyri parahippocampalis et ambiens left (merged region)                |
| thickness - Medial and inferior temporal gyri anterior part right                     | curvature - Gyri parahippocampalis et ambiens right (merged region)               |
| thickness - Lateral occipitotemporal gyrus gyrus                                      | GI - Anterior temporal lobe medial part left                                      |

|                                                                                  |                                                                           |
|----------------------------------------------------------------------------------|---------------------------------------------------------------------------|
| fusiformis anterior part left                                                    |                                                                           |
| thickness - Lateral occipitotemporal gyrus gyrus                                 |                                                                           |
| fusiformis anterior part right                                                   | GI - Anterior temporal lobe medial part right                             |
| thickness - Insula right                                                         | GI - Anterior temporal lobe lateral part left                             |
| thickness - Insula left                                                          | GI - Anterior temporal lobe lateral part right                            |
|                                                                                  | GI - Gyri parahippocampalis et ambiens anterior part left                 |
| thickness - Occipital lobe right                                                 | GI - Gyri parahippocampalis et ambiens anterior part right                |
|                                                                                  |                                                                           |
| thickness - Occipital lobe left                                                  |                                                                           |
| thickness - Gyri parahippocampalis et ambiens posterior part right               | GI - Superior temporal gyrus middle part left                             |
| thickness - Gyri parahippocampalis et ambiens posterior part left                | GI - Superior temporal gyrus middle part right                            |
| thickness - Lateral occipitotemporal gyrus gyrus fusiformis posterior part right | GI - Medial and inferior temporal gyri anterior part left                 |
| thickness - Lateral occipitotemporal gyrus gyrus fusiformis posterior part left  | GI - Medial and inferior temporal gyri anterior part right                |
| thickness - Medial and inferior temporal gyri posterior part right               | GI - Lateral occipitotemporal gyrus gyrus fusiformis anterior part left   |
| thickness - Medial and inferior temporal gyri posterior part left                | GI - Lateral occipitotemporal gyrus gyrus fusiformis anterior part right  |
| thickness - Superior temporal gyrus posterior part right                         |                                                                           |
| thickness - Superior temporal gyrus posterior part left                          | GI - Occipital lobe right                                                 |
|                                                                                  |                                                                           |
| thickness - Cingulate gyrus anterior part right                                  | GI - Occipital lobe left                                                  |
| thickness - Cingulate gyrus anterior part left                                   | GI - Gyri parahippocampalis et ambiens posterior part right               |
|                                                                                  | GI - Gyri parahippocampalis et ambiens posterior part left                |
| thickness - Cingulate gyrus posterior part right                                 | GI - Lateral occipitotemporal gyrus gyrus fusiformis posterior part right |
| thickness - Cingulate gyrus posterior part left                                  | GI - Lateral occipitotemporal gyrus gyrus fusiformis posterior part left  |
|                                                                                  | GI - Medial and inferior temporal gyri posterior part right               |
| thickness - Frontal lobe right                                                   | GI - Medial and inferior temporal gyri posterior part left                |
| thickness - Frontal lobe left                                                    | GI - Superior temporal gyrus posterior part right                         |
| thickness - Parietal lobe right                                                  | GI - Superior temporal gyrus posterior part left                          |
| thickness - Parietal lobe left                                                   | GI - Cingulate gyrus anterior part right                                  |
| thickness - Temporal lobe left (merged region)                                   | GI - Cingulate gyrus anterior part left                                   |
| thickness - Temporal lobe right (merged region)                                  |                                                                           |
| thickness - Superior temporal gyrus left (merged region)                         | GI - Cingulate gyrus posterior part right                                 |
| thickness - Superior temporal gyrus right (merged region)                        | GI - Cingulate gyrus posterior part left                                  |
| thickness - Medial and inferior temporal gyri left (merged region)               |                                                                           |
| thickness - Medial and inferior temporal gyri right (merged region)              | GI - Frontal lobe right                                                   |
| thickness - Lateral occipitotemporal gyrus gyrus fusiformis left (merged region) | GI - Frontal lobe left                                                    |
|                                                                                  | GI - Parietal lobe right                                                  |



|                                                                                   |                                                                                        |
|-----------------------------------------------------------------------------------|----------------------------------------------------------------------------------------|
| thickness - Lateral occipitotemporal gyrus gyrus fusiformis right (merged region) | GI - Parietal lobe left                                                                |
| thickness - Cingulate gyrus left (merged region)                                  | GI - Temporal lobe left (merged region)                                                |
| thickness - Cingulate gyrus right (merged region)                                 | GI - Temporal lobe right (merged region)                                               |
| thickness - Gyri parahippocampalis et ambiens left (merged region)                | GI - Superior temporal gyrus left (merged region)                                      |
| thickness - Gyri parahippocampalis et ambiens right (merged region)               | GI - Superior temporal gyrus right (merged region)                                     |
|                                                                                   | GI - Medial and inferior temporal gyri left (merged region)                            |
| sulc                                                                              | GI - Medial and inferior temporal gyri right (merged region)                           |
| sulc - Anterior temporal lobe medial part left                                    | GI - Lateral occipitotemporal gyrus gyrus fusiformis left (merged region)              |
| sulc - Anterior temporal lobe medial part right                                   | GI - Lateral occipitotemporal gyrus gyrus fusiformis right (merged region)             |
| sulc - Anterior temporal lobe lateral part left                                   | GI - Cingulate gyrus left (merged region)                                              |
| sulc - Anterior temporal lobe lateral part right                                  | GI - Cingulate gyrus right (merged region)                                             |
| sulc - Gyri parahippocampalis et ambiens anterior part left                       | GI - Gyri parahippocampalis et ambiens left (merged region)                            |
| sulc - Gyri parahippocampalis et ambiens anterior part right                      | GI - Gyri parahippocampalis et ambiens right (merged region)                           |
| sulc - Superior temporal gyrus middle part left                                   | rel-surface-area - Anterior temporal lobe medial part left                             |
| sulc - Superior temporal gyrus middle part right                                  | rel-surface-area - Anterior temporal lobe medial part right                            |
| sulc - Medial and inferior temporal gyri anterior part left                       | rel-surface-area - Anterior temporal lobe lateral part left                            |
| sulc - Medial and inferior temporal gyri anterior part right                      | rel-surface-area - Anterior temporal lobe lateral part right                           |
| sulc - Lateral occipitotemporal gyrus gyrus fusiformis anterior part left         | rel-surface-area - Gyri parahippocampalis et ambiens anterior part left                |
| sulc - Lateral occipitotemporal gyrus gyrus fusiformis anterior part right        | rel-surface-area - Gyri parahippocampalis et ambiens anterior part right               |
| sulc - Insula right                                                               | rel-surface-area - Superior temporal gyrus middle part left                            |
| sulc - Insula left                                                                | rel-surface-area - Superior temporal gyrus middle part right                           |
| sulc - Occipital lobe right                                                       | rel-surface-area - Medial and inferior temporal gyri anterior part left                |
| sulc - Occipital lobe left                                                        | rel-surface-area - Medial and inferior temporal gyri anterior part right               |
| sulc - Gyri parahippocampalis et ambiens posterior part right                     | rel-surface-area - Lateral occipitotemporal gyrus gyrus fusiformis anterior part left  |
| sulc - Gyri parahippocampalis et ambiens posterior part left                      | rel-surface-area - Lateral occipitotemporal gyrus gyrus fusiformis anterior part right |
| sulc - Lateral occipitotemporal gyrus gyrus fusiformis posterior part right       | rel-surface-area - Insula right                                                        |
| sulc - Lateral occipitotemporal gyrus gyrus fusiformis posterior part left        | rel-surface-area - Insula left                                                         |
| sulc - Medial and inferior temporal gyri posterior part right                     |                                                                                        |

|                                                                                                                                                                                                                                                                                                                                                                                                                                                                                                                                                                                                                                                                                                                                                                                                                                                                                                                                                                                                                                                                                                                                                                                                                                                                                                                                                                                                                                                                                                                                                                                                                                                                                                                                                                       |                                                                                                                                                                                                                                                                                                                                                                                                                                                                                                                                                                                                                                                                                                                                                                                                                                                                                                                                                                                                                                                                                                                                                                                                                                                                                                                                                                                                                                                                                                                                                                                                                                                                                                                                                                                                                                                                                                                                                                                                                                                                                                                                                             |
|-----------------------------------------------------------------------------------------------------------------------------------------------------------------------------------------------------------------------------------------------------------------------------------------------------------------------------------------------------------------------------------------------------------------------------------------------------------------------------------------------------------------------------------------------------------------------------------------------------------------------------------------------------------------------------------------------------------------------------------------------------------------------------------------------------------------------------------------------------------------------------------------------------------------------------------------------------------------------------------------------------------------------------------------------------------------------------------------------------------------------------------------------------------------------------------------------------------------------------------------------------------------------------------------------------------------------------------------------------------------------------------------------------------------------------------------------------------------------------------------------------------------------------------------------------------------------------------------------------------------------------------------------------------------------------------------------------------------------------------------------------------------------|-------------------------------------------------------------------------------------------------------------------------------------------------------------------------------------------------------------------------------------------------------------------------------------------------------------------------------------------------------------------------------------------------------------------------------------------------------------------------------------------------------------------------------------------------------------------------------------------------------------------------------------------------------------------------------------------------------------------------------------------------------------------------------------------------------------------------------------------------------------------------------------------------------------------------------------------------------------------------------------------------------------------------------------------------------------------------------------------------------------------------------------------------------------------------------------------------------------------------------------------------------------------------------------------------------------------------------------------------------------------------------------------------------------------------------------------------------------------------------------------------------------------------------------------------------------------------------------------------------------------------------------------------------------------------------------------------------------------------------------------------------------------------------------------------------------------------------------------------------------------------------------------------------------------------------------------------------------------------------------------------------------------------------------------------------------------------------------------------------------------------------------------------------------|
| <p>           sulc - Medial and inferior temporal gyri posterior part left<br/>           sulc - Superior temporal gyrus posterior part right<br/>           sulc - Superior temporal gyrus posterior part left<br/>           sulc - Cingulate gyrus anterior part right<br/>           sulc - Cingulate gyrus anterior part left<br/>           sulc - Cingulate gyrus posterior part right<br/>           sulc - Cingulate gyrus posterior part left<br/>           sulc - Frontal lobe right<br/>           sulc - Frontal lobe left<br/>           sulc - Parietal lobe right<br/>           sulc - Parietal lobe left<br/>           sulc - Temporal lobe left (merged region)<br/>           sulc - Temporal lobe right (merged region)<br/>           sulc - Superior temporal gyrus left (merged region)<br/>           sulc - Superior temporal gyrus right (merged region)<br/>           sulc - Medial and inferior temporal gyri left (merged region)<br/>           sulc - Medial and inferior temporal gyri right (merged region)<br/>           sulc - Lateral occipitotemporal gyrus gyrus fusiformis left (merged region)<br/>           sulc - Lateral occipitotemporal gyrus gyrus fusiformis right (merged region)<br/>           sulc - Cingulate gyrus left (merged region)<br/>           sulc - Cingulate gyrus right (merged region)<br/>           sulc - Gyri parahippocampalis et ambiens left (merged region)<br/>           sulc - Gyri parahippocampalis et ambiens right (merged region)<br/>           curvature<br/>           curvature - Anterior temporal lobe medial part left<br/>           curvature - Anterior temporal lobe medial part right<br/>           curvature - Anterior temporal lobe lateral part         </p> | <p>           rel-surface-area - Occipital lobe right<br/>           rel-surface-area - Occipital lobe left<br/>           rel-surface-area - Gyri parahippocampalis et ambiens posterior part right<br/>           rel-surface-area - Gyri parahippocampalis et ambiens posterior part left<br/>           rel-surface-area - Lateral occipitotemporal gyrus gyrus fusiformis posterior part right<br/>           rel-surface-area - Lateral occipitotemporal gyrus gyrus fusiformis posterior part left<br/>           rel-surface-area - Medial and inferior temporal gyri posterior part right<br/>           rel-surface-area - Medial and inferior temporal gyri posterior part left<br/>           rel-surface-area - Superior temporal gyrus posterior part right<br/>           rel-surface-area - Superior temporal gyrus posterior part left<br/>           rel-surface-area - Cingulate gyrus anterior part right<br/>           rel-surface-area - Cingulate gyrus anterior part left<br/>           rel-surface-area - Cingulate gyrus posterior part right<br/>           rel-surface-area - Cingulate gyrus posterior part left<br/>           rel-surface-area - Frontal lobe right<br/>           rel-surface-area - Frontal lobe left<br/>           rel-surface-area - Parietal lobe right<br/>           rel-surface-area - Parietal lobe left<br/>           rel-surface-area - Temporal lobe left (merged region)<br/>           rel-surface-area - Temporal lobe right (merged region)<br/>           rel-surface-area - Superior temporal gyrus left (merged region)<br/>           rel-surface-area - Superior temporal gyrus right (merged region)<br/>           rel-surface-area - Medial and inferior temporal gyri left (merged region)<br/>           rel-surface-area - Medial and inferior temporal gyri right (merged region)<br/>           rel-surface-area - Lateral occipitotemporal gyrus gyrus fusiformis left (merged region)<br/>           rel-surface-area - Lateral occipitotemporal gyrus gyrus fusiformis right (merged region)<br/>           rel-surface-area - Cingulate gyrus left (merged         </p> |
|-----------------------------------------------------------------------------------------------------------------------------------------------------------------------------------------------------------------------------------------------------------------------------------------------------------------------------------------------------------------------------------------------------------------------------------------------------------------------------------------------------------------------------------------------------------------------------------------------------------------------------------------------------------------------------------------------------------------------------------------------------------------------------------------------------------------------------------------------------------------------------------------------------------------------------------------------------------------------------------------------------------------------------------------------------------------------------------------------------------------------------------------------------------------------------------------------------------------------------------------------------------------------------------------------------------------------------------------------------------------------------------------------------------------------------------------------------------------------------------------------------------------------------------------------------------------------------------------------------------------------------------------------------------------------------------------------------------------------------------------------------------------------|-------------------------------------------------------------------------------------------------------------------------------------------------------------------------------------------------------------------------------------------------------------------------------------------------------------------------------------------------------------------------------------------------------------------------------------------------------------------------------------------------------------------------------------------------------------------------------------------------------------------------------------------------------------------------------------------------------------------------------------------------------------------------------------------------------------------------------------------------------------------------------------------------------------------------------------------------------------------------------------------------------------------------------------------------------------------------------------------------------------------------------------------------------------------------------------------------------------------------------------------------------------------------------------------------------------------------------------------------------------------------------------------------------------------------------------------------------------------------------------------------------------------------------------------------------------------------------------------------------------------------------------------------------------------------------------------------------------------------------------------------------------------------------------------------------------------------------------------------------------------------------------------------------------------------------------------------------------------------------------------------------------------------------------------------------------------------------------------------------------------------------------------------------------|

left  
curvature - Anterior temporal lobe lateral part right  
curvature - Gyri parahippocampalis et ambiens anterior part left  
curvature - Gyri parahippocampalis et ambiens anterior part right  
curvature - Superior temporal gyrus middle part left  
curvature - Superior temporal gyrus middle part right  
curvature - Medial and inferior temporal gyri anterior part left  
curvature - Medial and inferior temporal gyri anterior part right  
curvature - Lateral occipitotemporal gyrus gyrus fusiformis anterior part left  
curvature - Lateral occipitotemporal gyrus gyrus fusiformis anterior part right  
curvature - Insula right  
curvature - Insula left  
curvature - Occipital lobe right  
curvature - Occipital lobe left  
curvature - Gyri parahippocampalis et ambiens posterior part right  
curvature - Gyri parahippocampalis et ambiens posterior part left  
curvature - Lateral occipitotemporal gyrus gyrus fusiformis posterior part right  
curvature - Lateral occipitotemporal gyrus gyrus fusiformis posterior part left  
curvature - Medial and inferior temporal gyri posterior part right  
curvature - Medial and inferior temporal gyri posterior part left  
curvature - Superior temporal gyrus posterior part right  
curvature - Superior temporal gyrus posterior part left  
curvature - Cingulate gyrus anterior part right  
curvature - Cingulate gyrus anterior part left  
curvature - Cingulate gyrus posterior part right  
curvature - Cingulate gyrus posterior part left  
curvature - Frontal lobe right  
curvature - Frontal lobe left  
curvature - Parietal lobe right  
curvature - Parietal lobe left  
curvature - Temporal lobe left (merged region)  
curvature - Temporal lobe right (merged region)  
curvature - Superior temporal gyrus left (merged region)

region)  
rel-surface-area - Cingulate gyrus right (merged region)  
rel-surface-area - Gyri parahippocampalis et ambiens left (merged region)  
rel-surface-area - Gyri parahippocampalis et ambiens right (merged region)

curvature - Superior temporal gyrus right (merged region)

curvature - Medial and inferior temporal gyri left (merged region)

curvature - Medial and inferior temporal gyri right (merged region)

curvature - Lateral occipitotemporal gyrus gyrus fusiformis left (merged region)

curvature - Lateral occipitotemporal gyrus gyrus fusiformis right (merged region)

curvature - Cingulate gyrus left (merged region)

curvature - Cingulate gyrus right (merged region)

curvature - Gyri parahippocampalis et ambiens left (merged region)

curvature - Gyri parahippocampalis et ambiens right (merged region)

GI

GI - Anterior temporal lobe medial part left

GI - Anterior temporal lobe medial part right

GI - Anterior temporal lobe lateral part left

GI - Anterior temporal lobe lateral part right

GI - Gyri parahippocampalis et ambiens anterior part left

GI - Gyri parahippocampalis et ambiens anterior part right

GI - Superior temporal gyrus middle part left

GI - Superior temporal gyrus middle part right

GI - Medial and inferior temporal gyri anterior part left

GI - Medial and inferior temporal gyri anterior part right

GI - Lateral occipitotemporal gyrus gyrus fusiformis anterior part left

GI - Lateral occipitotemporal gyrus gyrus fusiformis anterior part right

GI - Insula right

GI - Insula left

GI - Occipital lobe right

GI - Occipital lobe left

GI - Gyri parahippocampalis et ambiens posterior part right

GI - Gyri parahippocampalis et ambiens posterior part left

GI - Lateral occipitotemporal gyrus gyrus fusiformis posterior part right

GI - Lateral occipitotemporal gyrus gyrus fusiformis posterior part left

GI - Medial and inferior temporal gyri posterior part right

GI - Medial and inferior temporal gyri posterior part left

GI - Superior temporal gyrus posterior part right  
GI - Superior temporal gyrus posterior part left  
GI - Cingulate gyrus anterior part right  
GI - Cingulate gyrus anterior part left  
GI - Cingulate gyrus posterior part right  
GI - Cingulate gyrus posterior part left  
GI - Frontal lobe right  
GI - Frontal lobe left  
GI - Parietal lobe right  
GI - Parietal lobe left  
GI - Temporal lobe left (merged region)  
GI - Temporal lobe right (merged region)  
GI - Superior temporal gyrus left (merged region)  
GI - Superior temporal gyrus right (merged region)  
GI - Medial and inferior temporal gyri left (merged region)  
GI - Medial and inferior temporal gyri right (merged region)  
GI - Lateral occipitotemporal gyrus gyrus fusiformis left (merged region)  
GI - Lateral occipitotemporal gyrus gyrus fusiformis right (merged region)  
GI - Cingulate gyrus left (merged region)  
GI - Cingulate gyrus right (merged region)  
GI - Gyri parahippocampalis et ambiens left (merged region)  
GI - Gyri parahippocampalis et ambiens right (merged region)  
surface-area  
surface-area - Anterior temporal lobe medial part left  
surface-area - Anterior temporal lobe medial part right  
surface-area - Anterior temporal lobe lateral part left  
surface-area - Anterior temporal lobe lateral part right  
surface-area - Gyri parahippocampalis et ambiens anterior part left  
surface-area - Gyri parahippocampalis et ambiens anterior part right  
surface-area - Superior temporal gyrus middle part left  
surface-area - Superior temporal gyrus middle part right  
surface-area - Medial and inferior temporal gyri anterior part left  
surface-area - Medial and inferior temporal gyri anterior part right

surface-area - Lateral occipitotemporal gyrus  
gyrus fusiformis anterior part left  
surface-area - Lateral occipitotemporal gyrus  
gyrus fusiformis anterior part right  
surface-area - Insula right  
surface-area - Insula left  
surface-area - Occipital lobe right  
surface-area - Occipital lobe left  
surface-area - Gyri parahippocampalis et ambiens  
posterior part right  
surface-area - Gyri parahippocampalis et ambiens  
posterior part left  
surface-area - Lateral occipitotemporal gyrus  
gyrus fusiformis posterior part right  
surface-area - Lateral occipitotemporal gyrus  
gyrus fusiformis posterior part left  
surface-area - Medial and inferior temporal gyri  
posterior part right  
surface-area - Medial and inferior temporal gyri  
posterior part left  
surface-area - Superior temporal gyrus posterior  
part right  
surface-area - Superior temporal gyrus posterior  
part left  
surface-area - Cingulate gyrus anterior part right  
surface-area - Cingulate gyrus anterior part left  
surface-area - Cingulate gyrus posterior part right  
surface-area - Cingulate gyrus posterior part left  
surface-area - Frontal lobe right  
surface-area - Frontal lobe left  
surface-area - Parietal lobe right  
surface-area - Parietal lobe left  
surface-area - Temporal lobe left (merged region)  
surface-area - Temporal lobe right (merged  
region)  
surface-area - Superior temporal gyrus left  
(merged region)  
surface-area - Superior temporal gyrus right  
(merged region)  
surface-area - Medial and inferior temporal gyri  
left (merged region)  
surface-area - Medial and inferior temporal gyri  
right (merged region)  
surface-area - Lateral occipitotemporal gyrus  
gyrus fusiformis left (merged region)  
surface-area - Lateral occipitotemporal gyrus  
gyrus fusiformis right (merged region)  
surface-area - Cingulate gyrus left (merged  
region)  
surface-area - Cingulate gyrus right (merged  
region)

surface-area - Gyri parahippocampalis et ambiens  
left (merged region)  
surface-area - Gyri parahippocampalis et ambiens  
right (merged region)  
rel-surface-area - Anterior temporal lobe medial  
part left  
rel-surface-area - Anterior temporal lobe medial  
part right  
rel-surface-area - Anterior temporal lobe lateral  
part left  
rel-surface-area - Anterior temporal lobe lateral  
part right  
rel-surface-area - Gyri parahippocampalis et  
ambiens anterior part left  
rel-surface-area - Gyri parahippocampalis et  
ambiens anterior part right  
rel-surface-area - Superior temporal gyrus middle  
part left  
rel-surface-area - Superior temporal gyrus middle  
part right  
rel-surface-area - Medial and inferior temporal  
gyri anterior part left  
rel-surface-area - Medial and inferior temporal  
gyri anterior part right  
rel-surface-area - Lateral occipitotemporal gyrus  
gyrus fusiformis anterior part left  
rel-surface-area - Lateral occipitotemporal gyrus  
gyrus fusiformis anterior part right  
rel-surface-area - Insula right  
rel-surface-area - Insula left  
rel-surface-area - Occipital lobe right  
rel-surface-area - Occipital lobe left  
rel-surface-area - Gyri parahippocampalis et  
ambiens posterior part right  
rel-surface-area - Gyri parahippocampalis et  
ambiens posterior part left  
rel-surface-area - Lateral occipitotemporal gyrus  
gyrus fusiformis posterior part right  
rel-surface-area - Lateral occipitotemporal gyrus  
gyrus fusiformis posterior part left  
rel-surface-area - Medial and inferior temporal  
gyri posterior part right  
rel-surface-area - Medial and inferior temporal  
gyri posterior part left  
rel-surface-area - Superior temporal gyrus  
posterior part right  
rel-surface-area - Superior temporal gyrus  
posterior part left  
rel-surface-area - Cingulate gyrus anterior part  
right  
rel-surface-area - Cingulate gyrus anterior part  
left

rel-surface-area - Cingulate gyrus posterior part  
right  
rel-surface-area - Cingulate gyrus posterior part  
left  
rel-surface-area - Frontal lobe right  
rel-surface-area - Frontal lobe left  
rel-surface-area - Parietal lobe right  
rel-surface-area - Parietal lobe left  
rel-surface-area - Temporal lobe left (merged  
region)  
rel-surface-area - Temporal lobe right (merged  
region)  
rel-surface-area - Superior temporal gyrus left  
(merged region)  
rel-surface-area - Superior temporal gyrus right  
(merged region)  
rel-surface-area - Medial and inferior temporal  
gyri left (merged region)  
rel-surface-area - Medial and inferior temporal  
gyri right (merged region)  
rel-surface-area - Lateral occipitotemporal gyrus  
gyrus fusiformis left (merged region)  
rel-surface-area - Lateral occipitotemporal gyrus  
gyrus fusiformis right (merged region)  
rel-surface-area - Cingulate gyrus left (merged  
region)  
rel-surface-area - Cingulate gyrus right (merged  
region)  
rel-surface-area - Gyri parahippocampalis et  
ambiens left (merged region)  
rel-surface-area - Gyri parahippocampalis et  
ambiens right (merged region)



## References

1. Chawla, N.V., et al., *SMOTE: synthetic minority over-sampling technique*. Journal of artificial intelligence research, 2002. **16**: p. 321-357.
2. Batista, G.E., R.C. Prati, and M.C. Monard, *A study of the behavior of several methods for balancing machine learning training data*. ACM SIGKDD explorations newsletter, 2004. **6**(1): p. 20-29.
3. Breiman, L., et al., *Classification and regression trees*. 2017: Routledge.
4. Simonyan, K. and A. Zisserman, *Very deep convolutional networks for large-scale image recognition*. arXiv preprint arXiv:1409.1556, 2014.
5. Zhou, Z.-H., *Ensemble methods: foundations and algorithms*. 2019: Chapman and Hall/CRC.
6. Breiman, L., *Random forests*. Machine learning, 2001. **45**(1): p. 5-32.
7. Chen, T. and C. Guestrin. *Xgboost: A scalable tree boosting system*. in *Proceedings of the 22nd acm sigkdd international conference on knowledge discovery and data mining*. 2016.
8. Wolpert, D.H., *Stacked generalization*. Neural networks, 1992. **5**(2): p. 241-259.
9. Bryll, R., R. Gutierrez-Osuna, and F. Quek, *Attribute bagging: improving accuracy of classifier ensembles by using random feature subsets*. Pattern recognition, 2003. **36**(6): p. 1291-1302.
10. Chen, M., et al., *A multichannel deep neural network model analyzing multiscale functional brain connectome data for attention deficit hyperactivity disorder detection*. Radiology: Artificial Intelligence, 2019. **2**(1): p. e190012.
